# Supplementary material
Source: PubMed Central journal article supplement (PMC2495008)
Supplement: NIHMS54028-supplement-01.pdf [file NIHMS54028-supplement-01.pdf]

Cell Metabolism, Volume 7

## **Supplemental Data**

### **Article**

## **Serotonin Regulates *C. elegans* Fat and Feeding through Independent Molecular Mechanisms**

**Supriya Srinivasan, Leila Sadegh, Ida C. Elle, Anne G.L. Christensen,  
Nils J. Faergeman, and Kaveh Ashrafi**

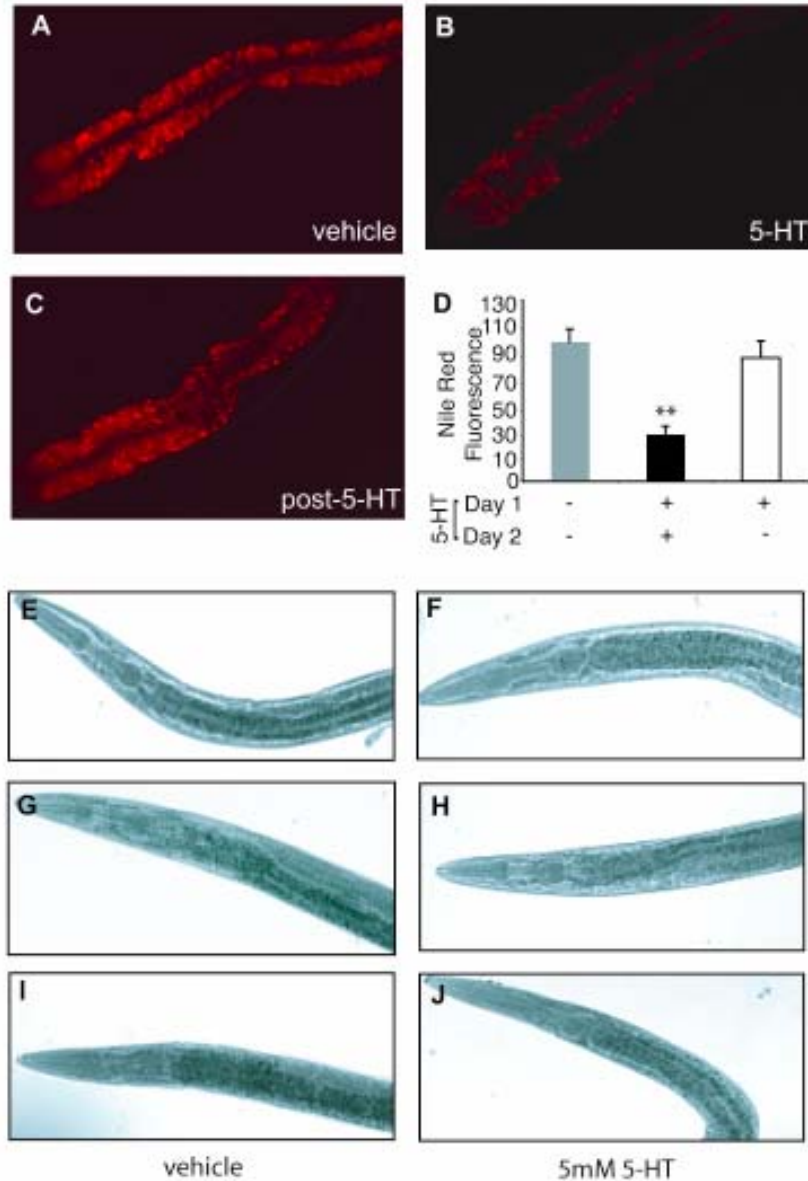

**Figure S1. 5-HT Reduces Fat Content as Gauged by Nile Red and Sudan Black B Staining Methods**

(A and B) Images of Nile Red-stained animals treated with (A) vehicle only, and (B) 5mM 5-HT.

(C) Reduced fat of 5-HT-treated animals was restored within ~ 24 hours once animals were removed from 5-HT-containing plates. In all images, the anterior end of the animals is oriented towards the left.

(D) Quantification of Nile Red fluorescence (n = 8-10 animals per condition, \*\*p < 0.005 compared to vehicle-treated animals). The data are expressed as a percentage of vehicle-treated animals on OP50 bacteria.

(E-J) Representative Sudan Black B images of animals treated with (E, G, and I) vehicle, and (F, H, and J) 5-HT, showing fat decreasing effects of 5-HT-treatment.

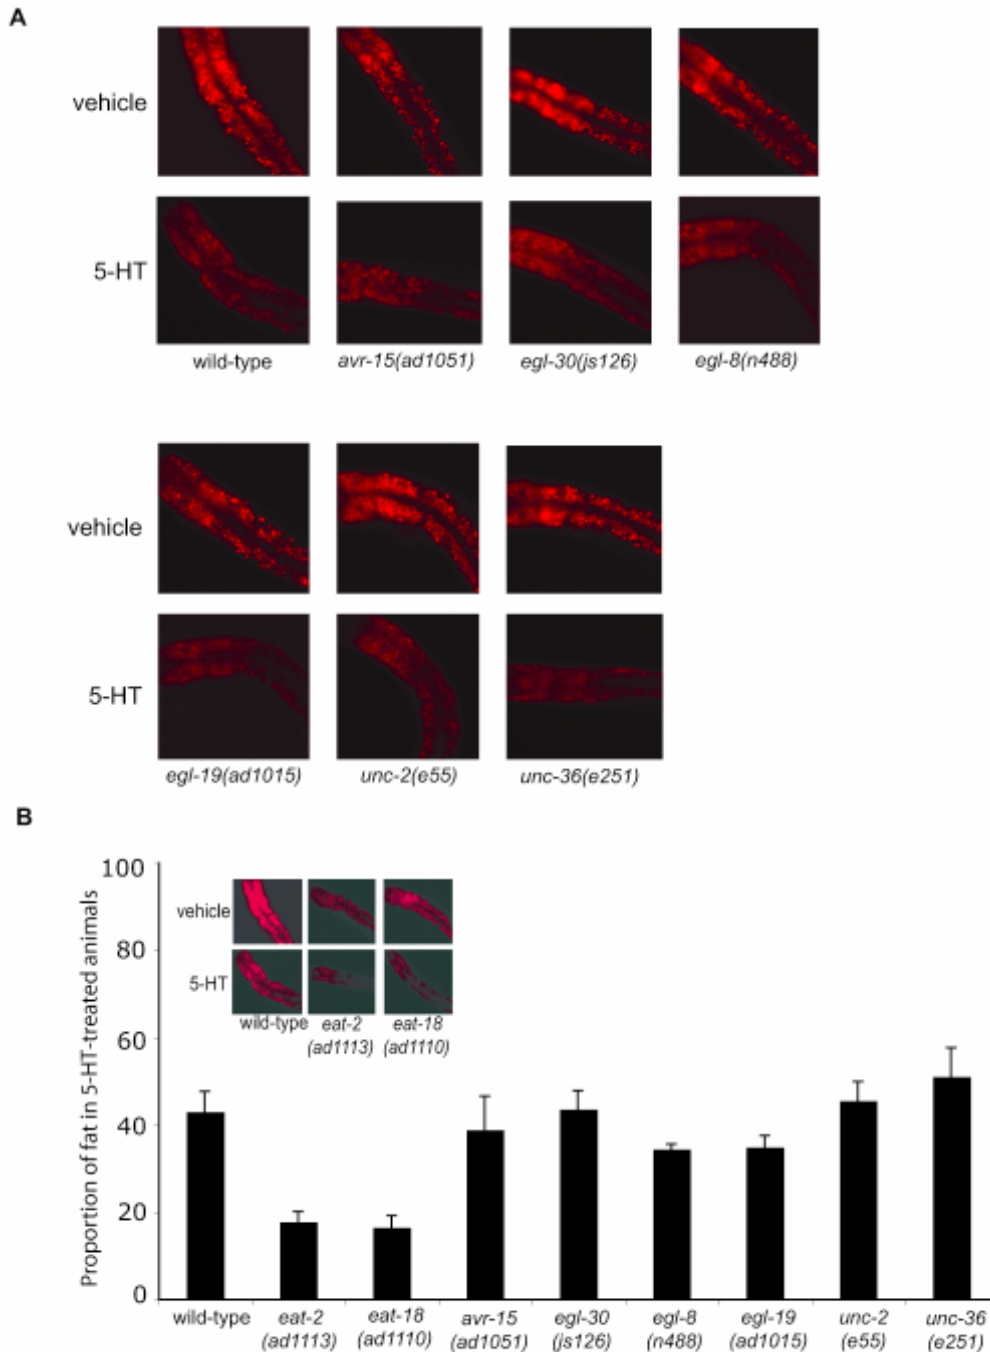

**Figure S2. 5-HT-Induced Fat Reduction Is Independent of Genes Required for Serotonergic Modulation of Feeding, Egg-Laying, and Locomotion**

(A) Representative images of Nile Red-stained animals treated with vehicle (top rows) or 5-HT (bottom rows). The anterior end of the animals is oriented towards the left.

(B) The percent of fat remaining upon 5-HT treatment for each genotype (n = 6-8) relative to vehicle-treated animals. Images in inset are overexposed as *eat-2(ad1113)* and *eat-18(ad1110)* mutants displayed reduced fat levels relative to wild type animals even in the absence of 5-HT treatment.

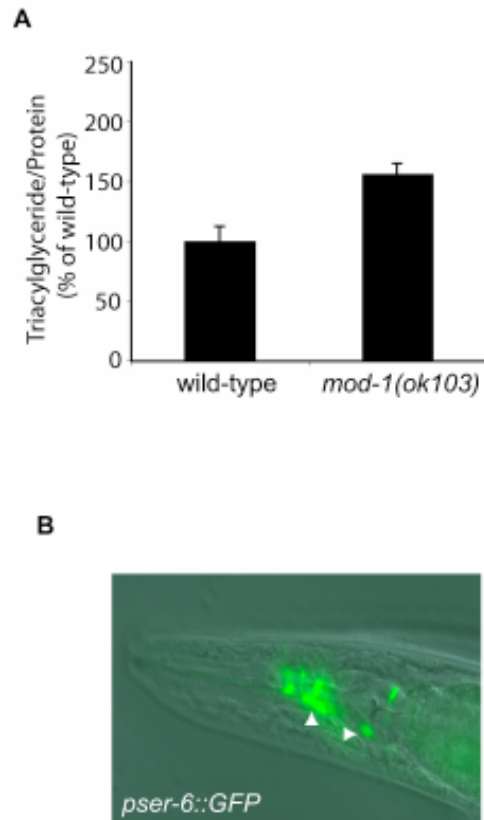

**Figure S3. Biochemical Verification of *mod-1(ok103)* Excess Fat and Expression Pattern of *ser-6***

(A) Values are expressed as a percentage of wild-type.

(B) A GFP reporter fused to the putative *Y54G2A.35/ser-6* promoter was expressed in several head neurons denoted by white arrowheads.

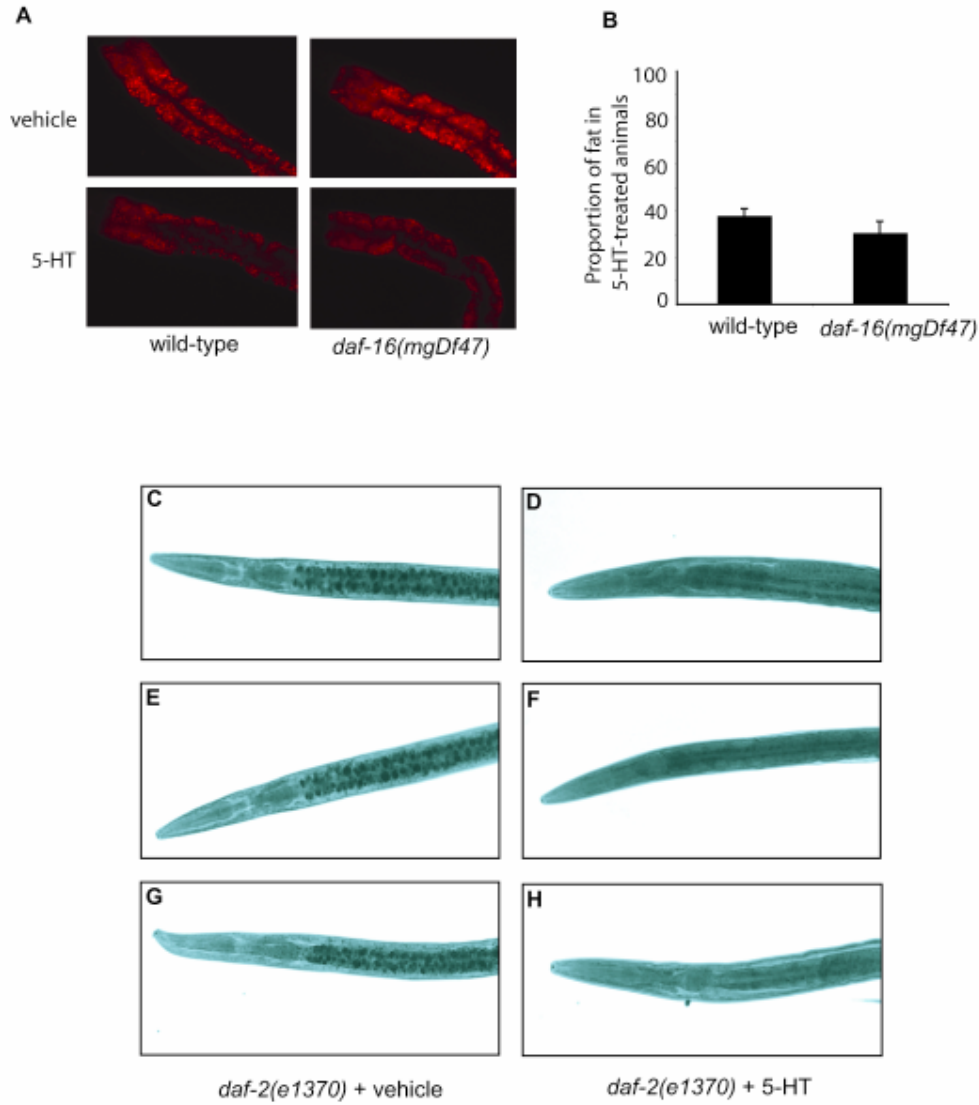

### Figure S4. The Insulin Pathway Is Not Required for Serotonergic Fat Reduction

(A) *daf-16(mgDf47)* mutation did not alter susceptibility of animals to 5-HT mediated fat reduction.

(B) Quantitation of Nile Red images shown in (A) (n = 8 per genotype).

(C-H) Representative Sudan Black-stained *daf-2(e1370)* animals exposed to either vehicle (C, E, and G) or 5-HT (D, F, and H) showing that, despite excess fat levels, *daf-2(e1370)* animals were susceptible to the fat-reducing effects of exogenous 5-HT.

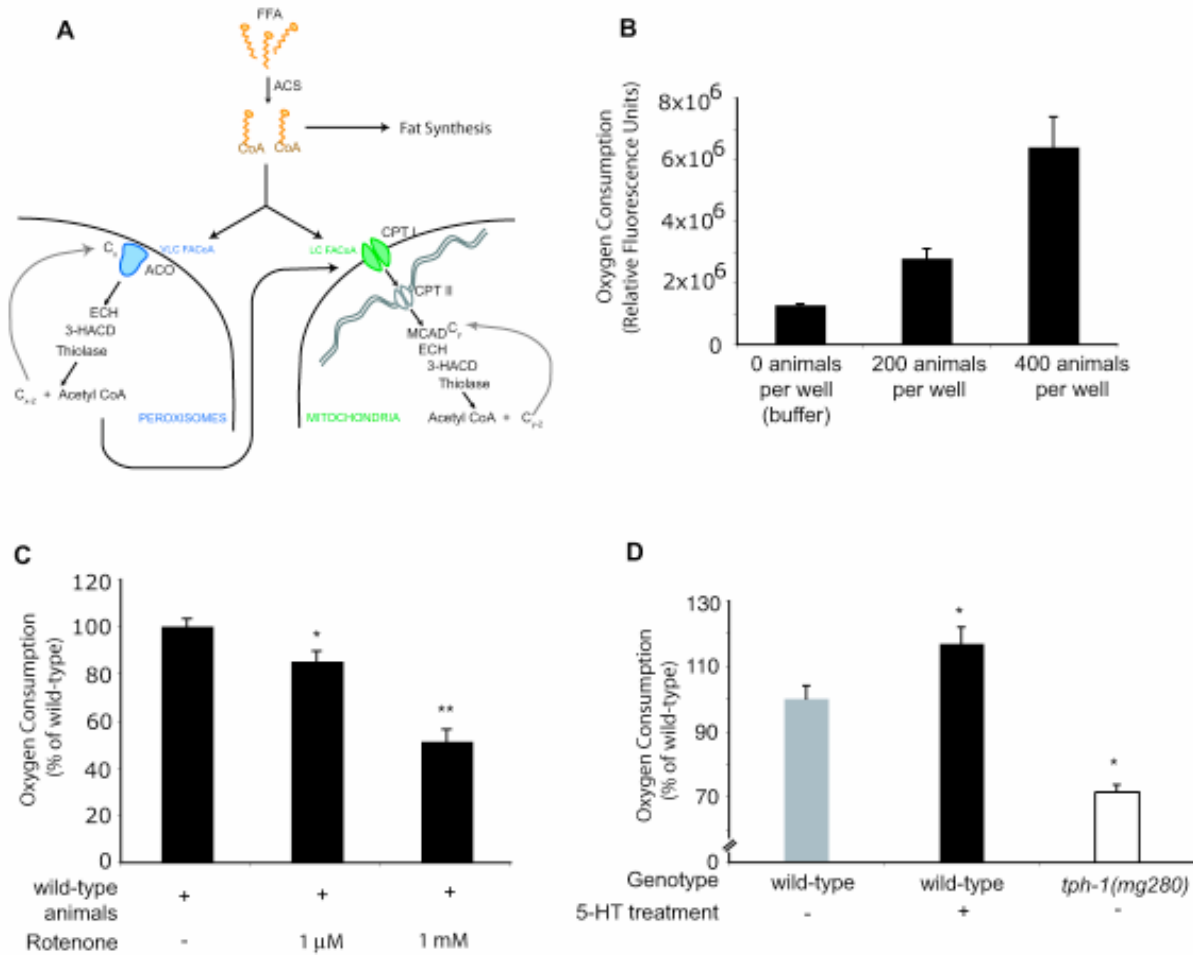

### Figure S5. Pictorial Depiction of Peroxisomal and Mitochondrial $\beta$ -Oxidation and Validation of the Oxygen Consumption Assay

(A) Model depicting peroxisomal and mitochondrial  $\beta$ -oxidation. Free fatty acids are activated to their respective CoA derivatives by acyl-CoA synthetases (ACS). Activated fatty acids are destined for either biosynthetic or degradative pathways. Peroxisomal  $\beta$ -oxidation of very long-chain fatty acids (VLCFA-CoA) is initiated by acyl-CoA oxidases (ACO) whereas long-chain fatty acids (LCFA-CoA) are targeted to the mitochondria, where carnitine-palmitoyl transferases I and II (CPT-I and CPT-II) catalyze their transfer into the inner lumen of mitochondria. Subsequent breakdown of these mitochondrial fatty acyl-CoAs is mediated by mitochondrial acyl-CoA dehydrogenase (MCAD). A trifunctional complex containing enoyl-CoA hydratase (ECH), 3'-OH-acyl-CoA dehydrogenase (3-HACD) and thiolase functions in both organelles resulting in the stepwise breakdown of fatty acyl-CoAs.

(B) Validation of the oxygen consumption assay. We empirically identified assay conditions that produced a linear correlation between oxygen consumption and number of animals tested. In all subsequent tests 200 worms/well were assayed.

(C) Rotenone, an inhibitor of oxidative phosphorylation and mitochondrial electron transport, caused a dose-dependent decrease in oxygen consumption under these assay conditions (\* $p < 0.05$ ; \*\* $p < 0.005$ ).

(D) Oxygen consumption rate of 5-HT-treated animals was enhanced while that of 5-HT deficient *tph-1(mg280)* animals was reduced (\* $p < 0.05$ ).

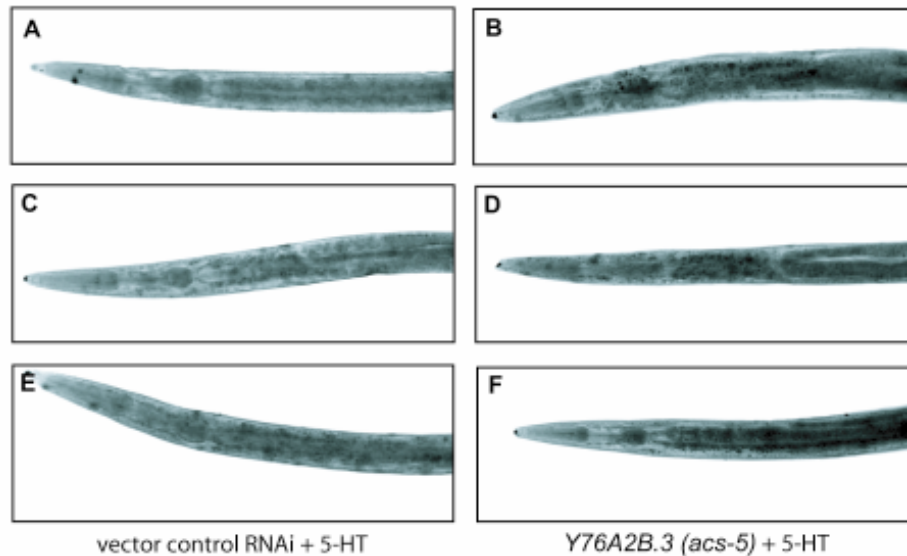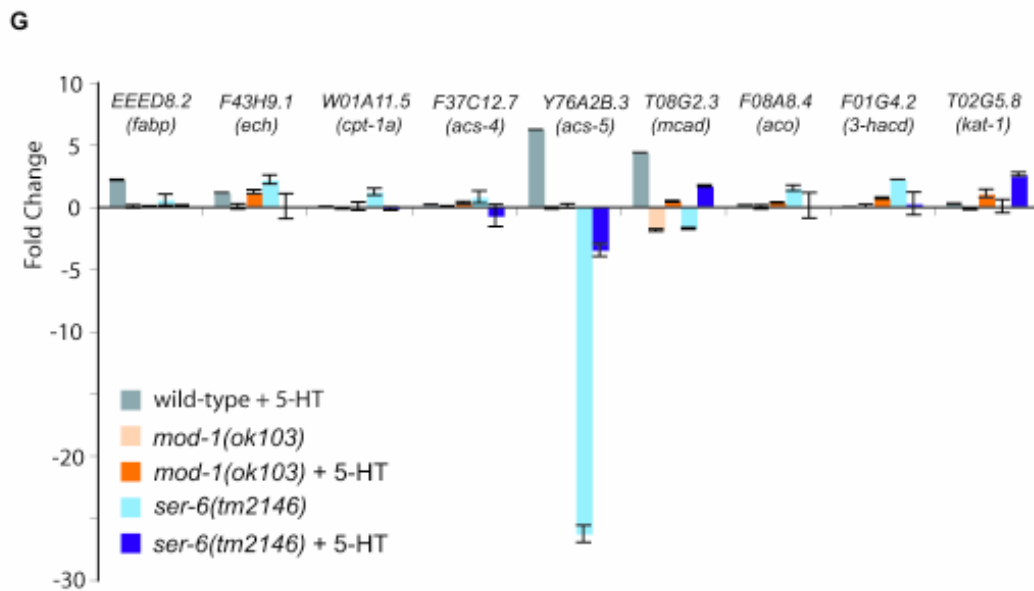

**Figure S6. Verification of 5-HT-Induced Fat Suppression of  $\beta$ -Oxidation Gene *Y76A2B.3* Using Sudan Black and Transcriptional Changes of  $\beta$ -Oxidation Genes in *mod-1(ok103)* and *ser-6(tm2146)* Mutants**

(A-F) Verification of Nile Red results by Sudan Black for *Y76A2B.3(acs-5)*. Three representative images showing that, relative to animals on vector RNAi (A, C, and E), *Y76A2B.3(acs-5)* RNAi (B, D, and F) allowed animals to retain more fat upon 5-HT treatment.

(G) qRT-PCR of the nine serotonergic  $\beta$ -oxidation genes for indicated genotypes +/- 5HT treatment. All values are shown as fold changes relative to wild-type animals without 5-HT treatment.

**Table S1. Known and Putative Biogenic Amine Receptors in *C. elegans***

| Gene ID    | Gene Name     | Dominant Specificity |
|------------|---------------|----------------------|
| F59C12.2   | <i>ser-1</i>  | Serotonin            |
| C02D4.2    | <i>ser-2</i>  | Octopamine           |
| K02F2.6    | <i>ser-3</i>  | Tyramine             |
| Y22D7AR.13 | <i>ser-4</i>  | Serotonin            |
| F16D3.7    | <i>ser-5</i>  | ND                   |
| Y54G2A.35  | <i>ser-6</i>  | ND                   |
| C09B7.1    | <i>ser-7</i>  | Serotonin            |
| K06C4.6    | <i>mod-1</i>  | Serotonin            |
| F15A8.5    | <i>dop-1</i>  | Dopamine             |
| K09G1.4    | <i>dop-2</i>  | Dopamine             |
| T14E8.3    | <i>dop-3</i>  | ND                   |
| C52B11.3   | <i>dop-4</i>  | ND                   |
| F10E11.5   | <i>tyra-2</i> | Tyramine             |
| M03F4.3    | <i>tyra-3</i> | ND                   |
| F14D12.6   | -             | ND                   |
| T02E9.3    | -             | ND                   |
| C24A8.1    | -             | ND                   |

Dominant specificity listed is as determined by cell-based pharmacology studies (references in Chase and Koelle, 2007). ND, not determined.



**Table S2. List of RNAi Clones Used for the 5-HT Metabolic Screen**

| <b>Gene ID</b>                                 | <b>Gene Name</b>                   |
|------------------------------------------------|------------------------------------|
| <b>Fatty Acid Acylation</b>                    |                                    |
| F28F8.2/ <i>acs-2</i>                          | Acyl-CoA Synthetase                |
| F41C3.3/ <i>acs-11</i>                         | Acyl-CoA Synthetase                |
| C46F4.2/ <i>acs-17</i>                         | Acyl-CoA Synthetase                |
| F37C12.7                                       | Acyl-CoA Synthetase                |
| F47G6.2                                        | Acyl-CoA Synthetase                |
| Y65B4BL.5                                      | Acyl-CoA Synthetase                |
| R07C3.4                                        | Acyl-CoA Synthetase                |
| R09E10.3                                       | Acyl-CoA Synthetase                |
| Y76A2B.3                                       | Acyl-CoA Synthetase                |
| R09E10.4                                       | Acyl-CoA Synthetase                |
| F46E10.1                                       | Acyl-CoA Synthetase                |
| <b>Fatty Acid <math>\beta</math>-Oxidation</b> |                                    |
| R07H5.2/ <i>cpt-2</i>                          | Carnitine Palmitoyl Transferase II |
| Y48G9A.10/ <i>cpt-3</i>                        | Carnitine Palmitoyl Transferase I  |
| F09F3.9/ <i>cpt-5</i>                          | Carnitine Palmitoyl Transferase I  |
| W01A11.5/ <i>cpt-6</i>                         | Carnitine Palmitoyl Transferase I  |
| F41E7.6                                        | Carnitine Palmitoyl Transferase I  |
| T20B3.1                                        | Carnitine Palmitoyl Transferase I  |
| C02B10.1/ <i>ivd-1</i>                         | Acyl-CoA Dehydrogenase             |
| F54D5.7                                        | Acyl-CoA Dehydrogenase             |
| K06A5.6                                        | Acyl-CoA Dehydrogenase             |
| E04F6.5                                        | Acyl-CoA Dehydrogenase             |
| K05F1.3                                        | Acyl-CoA Dehydrogenase             |
| F28A10.6                                       | Acyl-CoA Dehydrogenase             |
| T08G2.3                                        | Acyl-CoA Dehydrogenase             |
| T25G12.5                                       | Acyl-CoA Dehydrogenase             |
| C44B7.8/ <i>pmp-1</i>                          | Peroxisomal Membrane Transporter   |
| C44B7.9/ <i>pmp-2</i>                          | Peroxisomal Membrane Transporter   |
| C48B4.1                                        | Acyl-CoA Oxidase                   |
| F25C8.1                                        | Acyl-CoA Oxidase                   |
| F59F4.1                                        | Acyl-CoA Oxidase                   |
| F08A8.1                                        | Acyl-CoA Oxidase                   |
| F08A8.2                                        | Acyl-CoA Oxidase                   |
| F08A8.3                                        | Acyl-CoA Oxidase                   |
| F08A8.4                                        | Acyl-CoA Oxidase                   |
| C29F3.1/ <i>ech-1</i>                          | Enoyl-CoA Hydratase                |
| F38H4.8/ <i>ech-2</i>                          | Enoyl-CoA Hydratase                |
| F43H9.1/ <i>ech-3</i>                          | Enoyl-CoA Hydratase                |
| R06F6.9/ <i>ech-4</i>                          | Enoyl-CoA Hydratase                |
| T05G5.6/ <i>ech-6</i>                          | Enoyl-CoA Hydratase                |
| Y105E8A.4/ <i>ech-7</i>                        | Enoyl-CoA Hydratase                |
| F01G10.2/ <i>ech-8</i>                         | Enoyl-CoA Hydratase                |
| F01G10.3/ <i>ech-9</i>                         | Enoyl-CoA Hydratase                |
| F01G4.2/ <i>ard-1</i>                          | 3-Hydroxy Acyl-CoA Dehydrogenase   |
| R09B5.6/ <i>hacd-1</i>                         | 3-Hydroxy Acyl-CoA Dehydrogenase   |
| B0272.3                                        | 3-Hydroxy Acyl-CoA Dehydrogenase   |
| F54C8.1                                        | 3-Hydroxy Acyl-CoA Dehydrogenase   |
| T02G5.8/ <i>kat-1</i>                          | Acetoacetyl-CoA Thiolase           |
| B0303.3                                        | 3-ketoacyl-CoA Thiolase            |
| Y57A10C.6                                      | 3-ketoacyl-CoA Thiolase            |

| Fatty Acid Desaturation and Elongation |                              |
|----------------------------------------|------------------------------|
| Y67H2A.8/fat-1                         | w3 Desaturase                |
| W02A2.1/fat-2                          | D12 Desaturase               |
| W08D2.4/fat-3                          | D6 Desaturase                |
| T13F2.1/fat-4                          | D5 Desaturase                |
| W06D12.3/fat-5                         | D9 Desaturase                |
| VZK822L.1/fat-6                        | D9 Desaturase                |
| F10D2.9/fat-7                          | D9 Desaturase                |
| F56H11.4/elo-1                         | PUFA elongase                |
| F11E6.5/elo-2                          | Palmitic acid elongase       |
| D2024.3/elo-3                          | PUFA elongase                |
| C40H1.4/elo-4                          | PUFA elongase                |
| F41H10.7/elo-5                         | PUFA elongase                |
| F41H10.8/elo-6                         | PUFA elongase                |
| F56H11.3/elo-7                         | PUFA elongase                |
| Y53F4B.2/elo-8                         | PUFA elongase                |
| F33D4.4                                | Desaturase                   |
| Fatty Acid Binding Proteins            |                              |
| F40F4.3/lbp-1                          | Fatty Acid Binding Protein   |
| F40F4.2/lbp-2                          | Fatty Acid Binding Protein   |
| F40F4.4/lbp-3                          | Fatty Acid Binding Protein   |
| ZK742.5/lbp-4                          | Fatty Acid Binding Protein   |
| W02D3.7/lbp-5                          | Fatty Acid Binding Protein   |
| W02D3.5/lbp-6                          | Fatty Acid Binding Protein   |
| T22G5.2/lbp-7                          | Fatty Acid Binding Protein   |
| T22G5.6/lbp-8                          | Fatty Acid Binding Protein   |
| Y40B10A.1/lbp-9                        | Fatty Acid Binding Protein   |
| EEED8.2                                | Fatty Acid Binding Protein   |
| EEED8.3                                | Fatty Acid Binding Protein   |
| F28D1.9                                | Fatty Acid Transport Protein |
| Phospholipid Metabolism                |                              |
| F13D12.9                               | Phospholipid Biosynthesis    |
| C03H5.4                                | Phospholipase A2             |
| C07E3.9                                | Phospholipase A2             |
| Fatty Acid Synthesis                   |                              |
| F32H2.5/fasn-1                         | Fatty Acid Synthase          |
| W09B6.1/pod-2                          | Acetyl-CoA Carboxylase       |
| Ketogenesis/Lipid Metabolism           |                              |
| T02G5.7                                | Acetoacetyl-CoA Thiolase     |
| T02G5.4                                | Acetoacetyl-CoA Thiolase     |
| F53A2.7                                | Acetoacetyl-CoA Thiolase     |
| T02G5.8/kat-1                          | Acetoacetyl-CoA Thiolase     |
| F25B4.6                                | HMG-CoA Synthase             |
| Y71G12B.10                             | HMG-CoA Lyase                |
| F10G8.9                                | Beta Keto-Acyl Synthetase    |
| C25A1.5                                | Fatty-Acid Hydroxylase       |
| C46C11.1                               | Hormone Sensitive Lipase     |
| C50D2.7                                | Glucokinase                  |

**Table S3. Nile Red Fluorescence Intensities for Various Epistatic Interactions**

| Strain                            | RNAi/Bacteria          | Nile Red Fluorescence |              | Proportion of Fat Retained upon 5-HT Treatment |
|-----------------------------------|------------------------|-----------------------|--------------|------------------------------------------------|
|                                   |                        | Vehicle               | 5-HT         |                                                |
| Wild-type (N2)                    | OP50                   | 100.0 ± 5.3           | 50.7 ± 3.7   | 50.7 ± 3.7                                     |
| <i>mod-1(ok103)</i>               | OP50                   | 121.2 ± 4.6           | 81.3 ± 1.9   | 67.1 ± 1.6                                     |
| <i>ser-6(tm2146)</i>              | OP50                   | 98.2 ± 4.8            | 76.4 ± 4.5   | 77.8 ± 4.6                                     |
| <i>ser-6(tm2146);mod-1(ok103)</i> | OP50                   | 124.8 ± 4.8           | 110.9 ± 5.9  | 88.9 ± 4.7                                     |
| Wild-type (N2)                    | vector control         | 100.0 ± 8.7           | 35.9 ± 5.3   | 35.9 ± 5.3                                     |
| Wild-type (N2)                    | <i>Y76A2B.3(acs-5)</i> | 112.2 ± 6.1           | 70.3 ± 3.9   | 62.7 ± 3.5                                     |
| Wild-type (N2)                    | <i>F08A8.4(aco)</i>    | 112.2 ± 6.7           | 72.1 ± 6.2   | 64.3 ± 5.5                                     |
| <i>mod-1(ok103)</i>               | vector control         | 120.0 ± 6.3           | 63.8 ± 3.4   | 53.2 ± 2.8                                     |
| <i>mod-1(ok103)</i>               | <i>Y76A2B.3(acs-5)</i> | 126.4 ± 6.3           | 96.1 ± 5.1   | 76.1 ± 2.1                                     |
| <i>mod-1(ok103)</i>               | <i>F08A8.4(aco)</i>    | 130.4 ± 6.1           | 100.3 ± 10.1 | 76.9 ± 1.8                                     |
| <i>ser-6(tm2146)</i>              | vector control         | 98.8 ± 7.7            | 71.2 ± 5.9   | 62.7 ± 5.1                                     |
| <i>ser-6(tm2146)</i>              | <i>Y76A2B.3(acs-5)</i> | 107.2 ± 5.0           | 80.2 ± 3.3   | 65.0 ± 2.3                                     |
| <i>ser-6(tm2146)</i>              | <i>F08A8.4(aco)</i>    | 109.9 ± 5.0           | 80.8 ± 3.1   | 64.0 ± 2.4                                     |

Vector control and all RNAi constructs were in HT115 bacterial strain, and the reported values are normalized to wild-type on HT115 instead of OP50. All values are means ± SEM (n = 8).

**Table S4. List of Primers Used for qRT-PCR**

| Gene ID  | Forward Primer         | Reverse Primer         |
|----------|------------------------|------------------------|
| W01A11.5 | TATGAACCAGCATCAGCTCG   | GACGATCGACTCCTTGCCC    |
| F08A8.4  | ATATCTGGAGAAGATTCGACC  | CAAGTACTTATCGACTGACGG  |
| EEED8.2  | TTCTCGAGTTGAGAGATCGG   | ATTCTGGCTCTCCGATCCG    |
| F37C12.7 | AAACAACCTCGAAGAACATGCC | TGCTTATACAGATCATCGAGG  |
| Y76A2B.3 | ATTCGAAGCTCCTGGATTGG   | CATTATTCTCCATTCTCATCAC |
| F43H9.1  | AGGAAAAGCTGTTGAGGAGG   | CTTTATACTTTCAGCGAGCAC  |
| T08G2.3  | TCGACAACAAGGTGCGCTC    | GAATTTGCGAGGTTCCCTCG   |
| F01G4.2  | CAGGACTTATGGATACTCCAC  | GGCATGCGGAGTGCTCCG     |
| T02G5.8  | GTTAATGAAGCCTTCTCATGTG | CAGCAACTCCGATTTGGCC    |
